# Supplementary material for: Principal interacting spin orbital: understanding the fragment interactions in open-shell systems
Source: Royal Society of Chemistry journal article supplement (doi:10.1039/d0cp00127a), 2020-01-01
Supplement: d0cp00127a1.pdf [file d0cp00127a1.pdf]

## Principal Interacting Spin Orbital: Understanding the fragment interactions in open-shell systems

Fu Kit Sheong, Jing-Xuan Zhang and Zhenyang Lin \*

### Supplementary Information

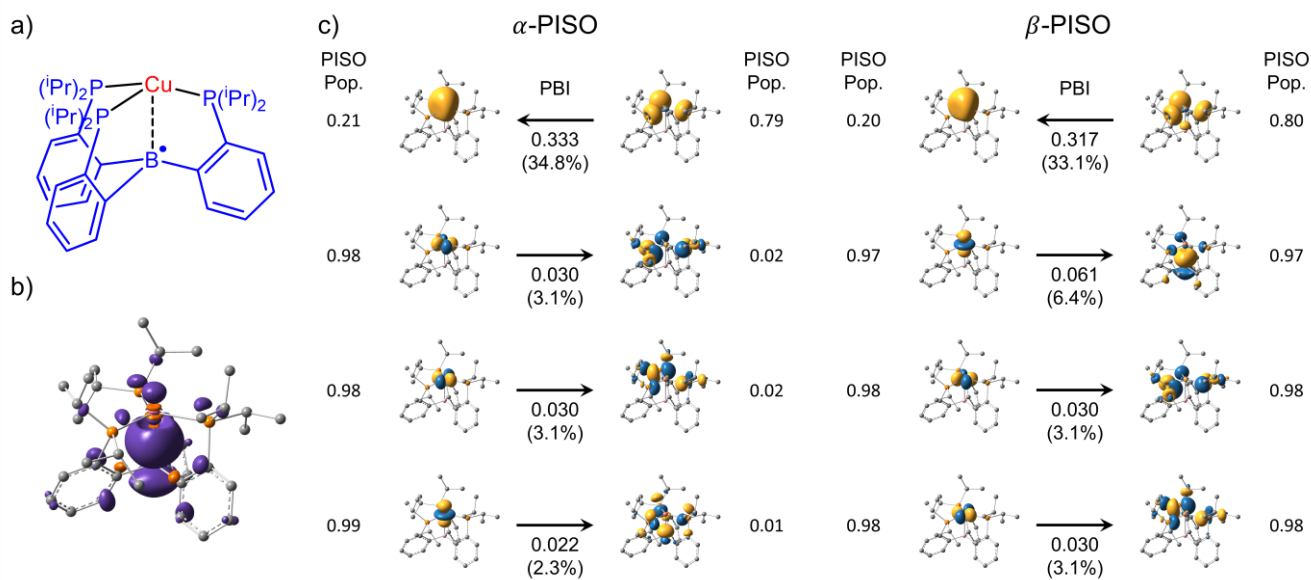

Figure S1 - PISO analysis of Cu(TPB). (a) Fragmentation scheme for the presented PISO analysis. (b) Spin density plot for the molecule, with purple indicating net  $\alpha$  density and dark orange indicating net  $\beta$  density. (c) Dominant PISOs for the interaction between Cu centre and the TPB ligand. One can see that a very similar bonding pattern is seen in the first  $\alpha$ -PISO pair and the first  $\beta$ -PISO pair, involving the donation of the lone pairs of three phosphine group to the Cu centre. The second and third  $\alpha$ -PISO pairs are also quite similar to the third and fourth  $\beta$ -PISO pairs, showing the interactions between the two in-plane d orbitals of the metal centre and the phosphine groups. The second  $\beta$ -PISO involves the interaction between the metal  $d_{22}$  orbital and the boron p orbital. For the fourth  $\alpha$ -PISO pair, the PISO on the Cu side is still the  $d_{22}$  orbital, but the PISO on the TPB side is quite different, similar to the  $VCl_4$  case mentioned in the main text. This could again be attributed to the spin density present around the boron centre, as seen in panel (b). An isovalue of  $0.05 a_0^{-3/2}$  was adopted for the PISOs and  $0.0025 a_0^{-3/2}$  was adopted for the spin density. The presented PISO analysis is based on a B3LYP/6-311+G(d,p) single-point calculation adopting the atom coordinates presented in the original reference (*J. Am. Chem. Soc.* 2013, 135, 10, 3792-3795).

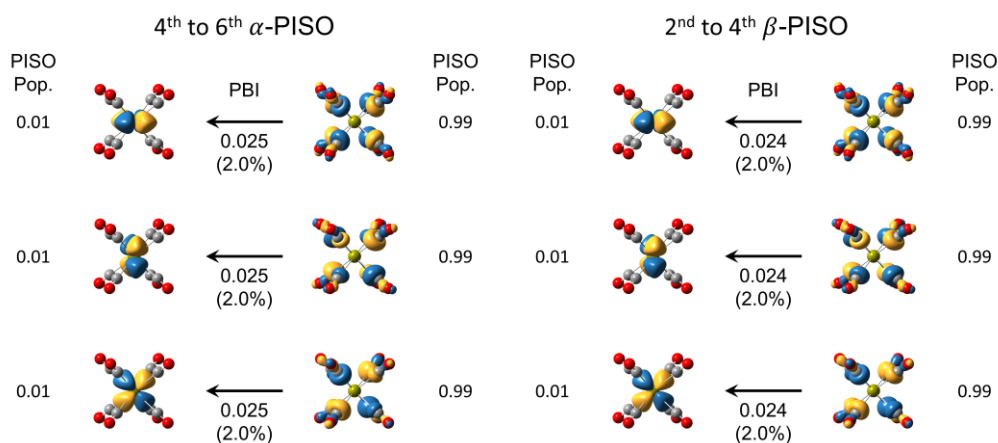

Figure S2 - PISO analysis of  $Ca(CO)_8$ . Note that the fourth to sixth  $\alpha$ -PISO pairs are very similar to the second to fourth  $\beta$ -PISO pairs. An isovalue of  $0.05 a_0^{-3/2}$  was adopted for the PISOs.

Table S1: Comparison of PIO analysis result for Ca(CO)<sub>8</sub> with Calcium centre having two different basis sets

|                            | Ca, C, O = def2-TZVP | Ca = def2-QZVP; C, O = def2-TZVP |
|----------------------------|----------------------|----------------------------------|
| 1 <sup>st</sup> α-PIO pair | 0.205, 0.795, 0.326  | 0.212, 0.788, 0.334              |
| 2 <sup>nd</sup> α-PIO pair | 0.107, 0.893, 0.190  | 0.107, 0.893, 0.192              |
| 3 <sup>rd</sup> α-PIO pair | 0.107, 0.893, 0.190  | 0.107, 0.893, 0.192              |
| 1 <sup>st</sup> β-PIO pair | 0.198, 0.802, 0.317  | 0.204, 0.796, 0.325              |

Same geometry, only larger basis set

## Result of Natural Resonance Theory (NRT) analysis

### NRT of Ca(CO)<sub>8</sub>

```

$NRTSTRA
STR          ! Wgt = 9.95%
LONE 1 1 2 2 3 1 4 1 5 1 6 1 7 1 8 1 9 1 10 1 11 1 12 1 13 1 14 1 15 1
      16 1 17 1 END
BOND S 1 3 D 2 3 T 4 5 T 6 7 T 8 9 T 10 11 T 12 13 T 14 15 T 16 17 END
END
STR          ! Wgt = 9.95%
LONE 1 1 2 1 3 1 4 2 5 1 6 1 7 1 8 1 9 1 10 1 11 1 12 1 13 1 14 1 15 1
      16 1 17 1 END
BOND S 1 5 T 2 3 D 4 5 T 6 7 T 8 9 T 10 11 T 12 13 T 14 15 T 16 17 END
END
STR          ! Wgt = 9.95%
LONE 1 1 2 1 3 1 4 1 5 1 6 2 7 1 8 1 9 1 10 1 11 1 12 1 13 1 14 1 15 1
      16 1 17 1 END
BOND S 1 7 T 2 3 T 4 5 D 6 7 T 8 9 T 10 11 T 12 13 T 14 15 T 16 17 END
END
STR          ! Wgt = 9.95%
LONE 1 1 2 1 3 1 4 1 5 1 6 1 7 1 8 2 9 1 10 1 11 1 12 1 13 1 14 1 15 1
      16 1 17 1 END
BOND S 1 9 T 2 3 T 4 5 T 6 7 D 8 9 T 10 11 T 12 13 T 14 15 T 16 17 END
END
STR          ! Wgt = 9.95%
LONE 1 1 2 1 3 1 4 1 5 1 6 1 7 1 8 1 9 1 10 2 11 1 12 1 13 1 14 1 15 1
      16 1 17 1 END
BOND S 1 11 T 2 3 T 4 5 T 6 7 T 8 9 D 10 11 T 12 13 T 14 15 T 16 17 END
END
STR          ! Wgt = 9.95%
LONE 1 1 2 1 3 1 4 1 5 1 6 1 7 1 8 1 9 1 10 1 11 1 12 2 13 1 14 1 15 1
      16 1 17 1 END
BOND S 1 13 T 2 3 T 4 5 T 6 7 T 8 9 T 10 11 D 12 13 T 14 15 T 16 17 END
END
STR          ! Wgt = 9.95%
LONE 1 1 2 1 3 1 4 1 5 1 6 1 7 1 8 1 9 1 10 1 11 1 12 1 13 1 14 2 15 1
      16 1 17 1 END
BOND S 1 15 T 2 3 T 4 5 T 6 7 T 8 9 T 10 11 T 12 13 D 14 15 T 16 17 END
END
STR          ! Wgt = 9.95%
LONE 1 1 2 1 3 1 4 1 5 1 6 1 7 1 8 1 9 1 10 1 11 1 12 1 13 1 14 1 15 1
      16 2 17 1 END
BOND S 1 17 T 2 3 T 4 5 T 6 7 T 8 9 T 10 11 T 12 13 T 14 15 D 16 17 END
END
STR          ! Wgt = 1.75%
LONE 1 2 3 1 4 1 5 1 6 1 7 2 8 1 9 1 10 1 11 1 12 1 13 1 14 1 15 1 16 1
      17 1 END
BOND T 2 3 S 2 6 T 4 5 D 6 7 T 8 9 T 10 11 T 12 13 T 14 15 T 16 17 END
END
STR          ! Wgt = 1.75%
LONE 1 2 2 1 3 1 5 1 6 1 7 1 8 1 9 2 10 1 11 1 12 1 13 1 14 1 15 1 16 1
      17 1 END
BOND T 2 3 T 4 5 S 4 8 T 6 7 D 8 9 T 10 11 T 12 13 T 14 15 T 16 17 END
END
STR          ! Wgt = 1.75%
LONE 1 2 2 1 3 2 4 1 5 1 7 1 8 1 9 1 10 1 11 1 12 1 13 1 14 1 15 1 16 1
      17 1 END
BOND D 2 3 S 2 6 T 4 5 T 6 7 T 8 9 T 10 11 T 12 13 T 14 15 T 16 17 END
END
STR          ! Wgt = 1.75%
LONE 1 2 2 1 3 1 4 1 5 2 6 1 7 1 9 1 10 1 11 1 12 1 13 1 14 1 15 1 16 1
      17 1 END
BOND T 2 3 D 4 5 S 4 8 T 6 7 T 8 9 T 10 11 T 12 13 T 14 15 T 16 17 END
END

```

```

STR          ! Wgt = 1.75%
LONE 1 2 2 1 3 1 4 1 5 1 6 1 7 1 8 1 9 1 11 1 12 1 13 1 14 1 15 2 16 1
      17 1 END
BOND T 2 3 T 4 5 T 6 7 T 8 9 T 10 11 S 10 14 T 12 13 D 14 15 T 16 17 END
END
STR          ! Wgt = 1.75%
LONE 1 2 2 1 3 1 4 1 5 1 6 1 7 1 8 1 9 1 10 1 11 1 13 1 14 1 15 1 16 1
      17 2 END
BOND T 2 3 T 4 5 T 6 7 T 8 9 T 10 11 T 12 13 S 12 16 T 14 15 D 16 17 END
END
STR          ! Wgt = 1.75%
LONE 1 2 2 1 3 1 4 1 5 1 6 1 7 1 8 1 9 1 10 1 11 2 12 1 13 1 15 1 16 1
      17 1 END
BOND T 2 3 T 4 5 T 6 7 T 8 9 D 10 11 S 10 14 T 12 13 T 14 15 T 16 17 END
END
STR          ! Wgt = 1.75%
LONE 1 2 2 1 3 1 4 1 5 1 6 1 7 1 8 1 9 1 10 1 11 1 12 1 13 2 14 1 15 1
      17 1 END
BOND T 2 3 T 4 5 T 6 7 T 8 9 T 10 11 D 12 13 S 12 16 T 14 15 T 16 17 END
END
$END

```

\$NRTSTRB

```

STR          ! Wgt = 78.23%
LONE 2 1 3 1 4 1 5 1 6 1 7 1 8 1 9 1 10 1 11 1 12 1 13 1 14 1 15 1 16 1
      17 1 END
BOND T 2 3 T 4 5 T 6 7 T 8 9 T 10 11 T 12 13 T 14 15 T 16 17 END
END
STR          ! Wgt = 2.72%
LONE 3 1 4 1 5 1 6 1 7 1 8 1 9 1 10 1 11 1 12 1 13 1 14 1 15 1 16 1 17 1
      END
BOND S 1 2 T 2 3 T 4 5 T 6 7 T 8 9 T 10 11 T 12 13 T 14 15 T 16 17 END
END
STR          ! Wgt = 2.72%
LONE 2 1 3 1 5 1 6 1 7 1 8 1 9 1 10 1 11 1 12 1 13 1 14 1 15 1 16 1 17 1
      END
BOND S 1 4 T 2 3 T 4 5 T 6 7 T 8 9 T 10 11 T 12 13 T 14 15 T 16 17 END
END
STR          ! Wgt = 2.72%
LONE 2 1 3 1 4 1 5 1 7 1 8 1 9 1 10 1 11 1 12 1 13 1 14 1 15 1 16 1 17 1
      END
BOND S 1 6 T 2 3 T 4 5 T 6 7 T 8 9 T 10 11 T 12 13 T 14 15 T 16 17 END
END
STR          ! Wgt = 2.72%
LONE 2 1 3 1 4 1 5 1 6 1 7 1 9 1 10 1 11 1 12 1 13 1 14 1 15 1 16 1 17 1
      END
BOND S 1 8 T 2 3 T 4 5 T 6 7 T 8 9 T 10 11 T 12 13 T 14 15 T 16 17 END
END
STR          ! Wgt = 2.72%
LONE 2 1 3 1 4 1 5 1 6 1 7 1 8 1 9 1 11 1 12 1 13 1 14 1 15 1 16 1 17 1
      END
BOND S 1 10 T 2 3 T 4 5 T 6 7 T 8 9 T 10 11 T 12 13 T 14 15 T 16 17 END
END
STR          ! Wgt = 2.72%
LONE 2 1 3 1 4 1 5 1 6 1 7 1 8 1 9 1 10 1 11 1 13 1 14 1 15 1 16 1 17 1
      END
BOND S 1 12 T 2 3 T 4 5 T 6 7 T 8 9 T 10 11 T 12 13 T 14 15 T 16 17 END
END
STR          ! Wgt = 2.72%
LONE 2 1 3 1 4 1 5 1 6 1 7 1 8 1 9 1 10 1 11 1 12 1 13 1 15 1 16 1 17 1
      END
BOND S 1 14 T 2 3 T 4 5 T 6 7 T 8 9 T 10 11 T 12 13 T 14 15 T 16 17 END
END
STR          ! Wgt = 2.72%
LONE 2 1 3 1 4 1 5 1 6 1 7 1 8 1 9 1 10 1 11 1 12 1 13 1 14 1 15 1 17 1
      END
BOND S 1 16 T 2 3 T 4 5 T 6 7 T 8 9 T 10 11 T 12 13 T 14 15 T 16 17 END
END
$END

```

## NRT of [Sc(CO)<sub>8</sub>]<sup>-</sup>

\$NRTSTR

```

STR          ! Wgt = 6.38%
LONE 1 1 2 1 3 2 4 1 5 1 6 1 7 1 8 1 9 1 10 1 11 1 12 1 13 1 14 1 15 1
      16 1 17 1 END
BOND S 1 2 D 2 3 T 4 5 T 6 7 T 8 9 T 10 11 T 12 13 T 14 15 T 16 17 END
END
STR          ! Wgt = 6.38%
LONE 1 1 2 1 3 1 4 1 5 1 6 1 7 1 8 1 9 2 10 1 11 1 12 1 13 1 14 1 15 1
      16 1 17 1 END
BOND S 1 8 T 2 3 T 4 5 T 6 7 D 8 9 T 10 11 T 12 13 T 14 15 T 16 17 END

```

## Supplementary Information

```

END
STR      ! Wgt = 6.38%
LONE 1 1 2 1 3 1 4 1 5 1 6 1 7 1 8 1 9 1 10 1 11 2 12 1 13 1 14 1 15 1
      16 1 17 1 END
BOND S 1 10 T 2 3 T 4 5 T 6 7 T 8 9 D 10 11 T 12 13 T 14 15 T 16 17 END
END
STR      ! Wgt = 6.38%
LONE 1 1 2 1 3 1 4 1 5 1 6 1 7 1 8 1 9 1 10 1 11 1 12 1 13 1 14 1 15 2
      16 1 17 1 END
BOND S 1 14 T 2 3 T 4 5 T 6 7 T 8 9 T 10 11 T 12 13 D 14 15 T 16 17 END
END
STR      ! Wgt = 6.38%
LONE 1 1 2 1 3 1 4 1 5 1 6 1 7 1 8 1 9 1 10 1 11 1 12 1 13 1 14 1 15 1
      16 1 17 2 END
BOND S 1 16 T 2 3 T 4 5 T 6 7 T 8 9 T 10 11 T 12 13 T 14 15 D 16 17 END
END
STR      ! Wgt = 6.38%
LONE 1 1 2 1 3 1 4 1 5 1 6 1 7 1 8 1 9 1 10 1 11 1 12 1 13 2 14 1 15 1
      16 1 17 1 END
BOND S 1 12 T 2 3 T 4 5 T 6 7 T 8 9 T 10 11 D 12 13 T 14 15 T 16 17 END
END
STR      ! Wgt = 6.38%
LONE 1 1 2 1 3 1 4 1 5 2 6 1 7 1 8 1 9 1 10 1 11 1 12 1 13 1 14 1 15 1
      16 1 17 1 END
BOND S 1 4 T 2 3 D 4 5 T 6 7 T 8 9 T 10 11 T 12 13 T 14 15 T 16 17 END
END
STR      ! Wgt = 6.38%
LONE 1 1 2 1 3 1 4 1 5 1 6 1 7 2 8 1 9 1 10 1 11 1 12 1 13 1 14 1 15 1
      16 1 17 1 END
BOND S 1 6 T 2 3 T 4 5 D 6 7 T 8 9 T 10 11 T 12 13 T 14 15 T 16 17 END
END
STR      ! Wgt = 6.12%
LONE 1 2 3 1 4 1 5 1 6 1 7 1 8 1 9 1 10 1 11 1 12 1 13 1 14 1 15 1 16 1
      17 1 END
BOND S 1 2 T 2 3 T 4 5 T 6 7 T 8 9 T 10 11 T 12 13 T 14 15 T 16 17 END
END
STR      ! Wgt = 6.12%
LONE 1 2 2 1 3 1 5 1 6 1 7 1 8 1 9 1 10 1 11 1 12 1 13 1 14 1 15 1 16 1
      17 1 END
BOND S 1 4 T 2 3 T 4 5 T 6 7 T 8 9 T 10 11 T 12 13 T 14 15 T 16 17 END
END
STR      ! Wgt = 6.12%
LONE 1 2 2 1 3 1 4 1 5 1 7 1 8 1 9 1 10 1 11 1 12 1 13 1 14 1 15 1 16 1
      17 1 END
BOND S 1 6 T 2 3 T 4 5 T 6 7 T 8 9 T 10 11 T 12 13 T 14 15 T 16 17 END
END
STR      ! Wgt = 6.12%
LONE 1 2 2 1 3 1 4 1 5 1 6 1 7 1 9 1 10 1 11 1 12 1 13 1 14 1 15 1 16 1
      17 1 END
BOND S 1 8 T 2 3 T 4 5 T 6 7 T 8 9 T 10 11 T 12 13 T 14 15 T 16 17 END
END
STR      ! Wgt = 6.12%
LONE 1 2 2 1 3 1 4 1 5 1 6 1 7 1 8 1 9 1 11 1 12 1 13 1 14 1 15 1 16 1
      17 1 END
BOND S 1 10 T 2 3 T 4 5 T 6 7 T 8 9 T 10 11 T 12 13 T 14 15 T 16 17 END
END
STR      ! Wgt = 6.12%
LONE 1 2 2 1 3 1 4 1 5 1 6 1 7 1 8 1 9 1 10 1 11 1 13 1 14 1 15 1 16 1
      17 1 END
BOND S 1 12 T 2 3 T 4 5 T 6 7 T 8 9 T 10 11 T 12 13 T 14 15 T 16 17 END
END
STR      ! Wgt = 6.12%
LONE 1 2 2 1 3 1 4 1 5 1 6 1 7 1 8 1 9 1 10 1 11 1 12 1 13 1 15 1 16 1
      17 1 END
BOND S 1 14 T 2 3 T 4 5 T 6 7 T 8 9 T 10 11 T 12 13 T 14 15 T 16 17 END
END
STR      ! Wgt = 6.12%
LONE 1 2 2 1 3 1 4 1 5 1 6 1 7 1 8 1 9 1 10 1 11 1 12 1 13 1 14 1 15 1
      17 1 END
BOND S 1 16 T 2 3 T 4 5 T 6 7 T 8 9 T 10 11 T 12 13 T 14 15 T 16 17 END
END
$END

```

Note that a large number of resonance structures are needed to denote each electronic structure, which can greatly complicate the interpretation process, and makes the comparison between the two complexes difficult (In the PIO analysis shown in Figure 6, 7 and S2, direct comparisons could be easily made because of the good correspondence between the PIO pairs). Moreover, it could be seen that the top 8 alpha Lewis structures of  $\text{Ca}(\text{CO})_8$  determined by NRT are all consist of Ca-O bonds, something that might be considered unphysical but was determined to have largest alpha contribution to the  $\text{Ca}(\text{CO})_8$  complex.
